# Supplementary material for: Translocation through the Conjugative Type IV Secretion System Requires Unfolding of Its Protein Substrate
Source: PubMed Central journal article supplement (PMC5826034; doi:10.1128/jb.00615-17), 2018-02-23
Supplement: JB.00615-17_zjb999094662s1.pdf [file JB.00615-17_zjb999094662s1.pdf]

## Supplemental material

**Figure S1.** Western blot of donor cells carrying R388 plasmid encoding wild-type or modified TrwC as indicated detected using self-made polyclonal  $\alpha$ -TrwC antibody.

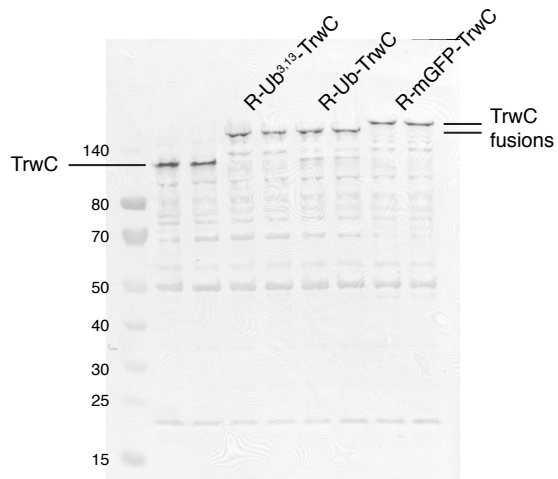

Shown are duplicates for each construct. The vast majority of the expressed TrwC consists of the full-length protein. There are no additional or stronger degradation bands in the R-Ub<sup>3,13</sup>-TrwC construct in comparison to R-Ub-TrwC.

**Supplementary table 1. Plasmids used in this study**

| Plasmids             | Description                                                                                                                                                                                                                                                                                            | Source               |
|----------------------|--------------------------------------------------------------------------------------------------------------------------------------------------------------------------------------------------------------------------------------------------------------------------------------------------------|----------------------|
| pRSFDuet-1           | Vector carrying two T7 promoters, RSF replicon, <i>lacI</i> gene and kanamycin resistance gene (KnR)                                                                                                                                                                                                   | Novagen              |
| pRSF-oriT            | pRSFDuet-1 vector containing R388 <i>oriT</i> sequence and lacking part of <i>lacI</i> gene and the first promoter region                                                                                                                                                                              | This study           |
| pUC18                | High copy number cloning vector                                                                                                                                                                                                                                                                        | Agilent Technologies |
| pUC-oriT             | pUC18 vector containing R388 <i>oriT</i> sequence                                                                                                                                                                                                                                                      | This study           |
| pBAD-B1-B10Strep     | pBAD <sub>M11</sub> vector containing the genes <i>trwN/virB1</i> , <i>trwL/virB2</i> , <i>trwM/virB3</i> , <i>trwK/virB4</i> , <i>trwJ/virB5</i> , <i>trwI/virB6</i> , <i>trwH/virB7</i> , <i>trwG/virB8</i> , <i>trwF/virB9</i> , and <i>trwE/virB10</i> , with a Strep tag fused to TrwE C-terminus | (1)                  |
| pASK-B1-B10Strep-B11 | pASK-IBA3C vector containing the R388 genes <i>virB1-virB11</i> , with a Strep tag fused to VirB10 C-terminus                                                                                                                                                                                          | (2)                  |
| pBAD-B1-B10Strep-B11 | Identical to pBAD-B1-B10Strep, but containing <i>virB11</i> downstream of <i>virB10Strep</i>                                                                                                                                                                                                           | This study           |
| pBAD/MCS             | Expression vector carrying <i>araBAD</i> promoter, <i>araC</i> gene and ampicillin resistance gene (AmpR)                                                                                                                                                                                              | EMBL                 |
| pBAD-ABCHis          | pBAD/MCS vector containing the R388 genes <i>trwA</i> , <i>trwB</i> , and <i>trwC</i> with a (Gly) <sub>3</sub> linker and a hexahistidine tag fused to the TrwC C-terminus                                                                                                                            | This study           |
| pBAD-ABC-T4SS        | Identical to pBAD-B1-B10Strep-B11, but containing the genes <i>trwA</i> , <i>trwB</i> , and <i>trwC</i> and a consensus <i>E. coli</i> rbs sequence upstream of <i>virB1</i> ; fused to the TrwC C-terminus is a hexahistidine tag separated by a (Gly) <sub>3</sub> linker                            | This study           |
| pBABE-Cre-ER-ERT2    | Vector encoding Cre recombinase                                                                                                                                                                                                                                                                        | (3)                  |
| pBAD-AB_Cre-C        | Identical to pBAD-ABCHis but containing Cre recombinase fused to the TrwC N-terminus with a (Gly) <sub>3</sub> Ser(Gly) <sub>2</sub> linker                                                                                                                                                            | This study           |
| pBAD-AB_R-Cre-H      | Identical to pBAD-ABCHis but containing Cre recombinase inserted between the TrwC relaxase (R; aa 1-312) and helixase (H; aa 1-313) domains with (Gly) <sub>3</sub> SerGly linkers at both sides                                                                                                       | This study           |
| pBAD-ABC-Cre         | Identical to pBAD-ABCHis but containing (Gly) <sub>3</sub> -mGFP-(Gly) <sub>3</sub> -His <sub>6</sub> fused to the TrwC C-terminus                                                                                                                                                                     | This study           |
| pBAD-AB_Cre-C_T4SS   | Identical to pBAD-AB_Cre-C but containing a consensus <i>E. coli</i> rbs sequence followed by <i>virB1-virB11</i> genes downstream of <i>trwC</i> (TrwE has a Strep tag fused to the C-terminus)                                                                                                       | This study           |
| pBAD-AB_R-Cre-H_T4SS | Identical to pBAD-AB_R-Cre-H but containing a consensus <i>E. coli</i> rbs sequence followed by <i>virB1-virB11</i> genes downstream of <i>trwC</i> (TrwE has a Strep tag fused to the C-terminus)                                                                                                     | This study           |
| pBAD-ABC-Cre_T4SS    | Identical to pBAD-ABC-Cre but containing a consensus <i>E. coli</i> rbs sequence followed by <i>virB1-virB11</i> genes                                                                                                                                                                                 | This study           |

|                           |                                                                                                                                                                                                  |            |
|---------------------------|--------------------------------------------------------------------------------------------------------------------------------------------------------------------------------------------------|------------|
|                           | downstream of <i>trwC</i> (TrwE has a Strep tag fused to the C-terminus)                                                                                                                         |            |
| pBAD-AB_Cre(Y324F)-C      | Identical to pBAD-AB_Cre-C but containing Y324F mutation in Cre                                                                                                                                  | This study |
| pETZt                     | Expression vector carrying <i>lacI</i> gene, kanamycin resistance gene (KnR), and T7 promoter encoding a hexahistidine tag followed by Z tag and TEV protease cleavage site                      | EMBL       |
| pETZt-TrwC                | pETZt vector encoding TrwC with an N-terminal hexahistidine tag followed by Z tag and TEV cleavage site                                                                                          | This study |
| pETZt-mGFP-TrwC           | pETZt vector encoding TrwC with an N-terminal hexahistidine tag followed by Z tag, TEV cleavage site, and mGFP                                                                                   | This study |
| pFastBacHT-mGFP           | A modified pFastBacHTa vector encoding monomeric GFP (the K221L mutation of eGFP; Zacharias et al. 2002)                                                                                         | (4)        |
| pBAD-ABC-mGFP             | Identical to pBAD-ABC-Cre but containing mGFP instead of Cre recombinase                                                                                                                         | This study |
| pBAD-AB_R-mGFP-H          | Identical to pBAD-AB_R-Cre-H but containing mGFP instead of Cre recombinase                                                                                                                      | This study |
| pBAD-AB_mGFP-C            | Identical to pBAD-AB_Cre-C but containing mGFP instead of Cre recombinase                                                                                                                        | This study |
| pET17-Ub                  | pET17b vector encoding ubiquitin (Ub)                                                                                                                                                            | (5)        |
| pET17-UbI3G,I13G          | pET17b vector encoding ubiquitin mutant; Ile at amino acid positions 3 and 13 mutated to Gly                                                                                                     | This study |
| pBAD-AB_Ub-C              | Identical to pBAD-AB_Cre-C but containing Ub instead of Cre recombinase                                                                                                                          | This study |
| pBAD-AB_Ub3,13-C          | Identical to pBAD-AB_Ub-C apart from ubiquitin Ile to Gly mutations at amino acid positions 3 and 13                                                                                             | This study |
| pBAD-AB_Cre-Ub-C          | Identical to pBAD-ABCHis but containing Cre-(Gly) <sup>3</sup> SerGly-Ub-(Gly) <sup>3</sup> Ser(Gly) <sup>2</sup> fused to the TrwC N-terminus                                                   | This study |
| pBAD-AB_Cre-Ub3,13-C      | Identical to pBAD-AB_Cre-Ub-C apart from ubiquitin Ile to Gly mutations at amino acid positions 3 and 13                                                                                         | This study |
| pBAD-AB_Cre-mGFP-C        | Identical to pBAD-AB_Cre-Ub-C but containing mGFP instead of Ub                                                                                                                                  | This study |
| pBAD-AB_Cre-Cre(Y324F)-C  | Identical to pBAD-AB_Cre-Ub-C but containing Cre(Y324F) instead of Ub                                                                                                                            | This study |
| pBAD-AB_Cre-Ub-C_T4SS     | Identical to pBAD-AB_Cre-Ub-C but containing a consensus E. coli rbs sequence followed by <i>virB1-virB11</i> genes downstream of <i>trwC</i> (TrwE has a Strep tag fused to the C-terminus)     | This study |
| pBAD-AB_Cre-Ub3,13-C_T4SS | Identical to pBAD-AB_Cre-Ub3,13-C but containing a consensus E. coli rbs sequence followed by <i>virB1-virB11</i> genes downstream of <i>trwC</i> (TrwE has a Strep tag fused to the C-terminus) | This study |
| pBAD-AB_Cre-mGFP-C_T4SS   | Identical to pBAD-AB_Cre-mGFP-C but containing a consensus E. coli rbs sequence followed by <i>virB1-virB11</i> genes downstream of <i>trwC</i> (TrwE has a Strep tag fused to the C-terminus)   | This study |

|                                 |                                                                                                                                                                                                                                                                                                                             |                  |
|---------------------------------|-----------------------------------------------------------------------------------------------------------------------------------------------------------------------------------------------------------------------------------------------------------------------------------------------------------------------------|------------------|
| pBAD-AB_Cre-Cre(Y324F)-C_T4SS   | Identical to pBAD-AB_Cre-Cre(Y324F)-C but containing a consensus E. coli rbs sequence followed by <i>virB1-virB11</i> genes downstream of <i>trwC</i> (TrwE has a Strep tag fused to the C-terminus)                                                                                                                        | This study       |
| pBAD-AB_R-Ub-H                  | Identical to pBAD-ABCHis but containing (Gly) <sup>3</sup> Ser(Gly) <sup>3</sup> Ub-(Gly) <sup>3</sup> SerGly inserted between the TrwC relaxase (R; aa 1-312) and helicase (H; aa 313-966) domains                                                                                                                         | This study       |
| pBAD-AB_R-Ub <sub>3,13</sub> -H | Identical to pBAD-AB_R-Ub-H apart from ubiquitin Ile to Gly mutations at amino acid positions 3 and 13                                                                                                                                                                                                                      | This study       |
| pBAD-AB_R-Ub-C                  | pBAD/MCS vector containing the genes <i>trwA</i> , <i>trwB</i> , and modified <i>trwC</i> ; TrwC contains a duplicated relaxase domain (R; aa 1-305) followed by (Gly) <sup>3</sup> -His6-GlySer(Gly) <sup>3</sup> Ub-(Gly) <sup>3</sup> SerGly at its N-terminus and the second relaxase domain lacks the first methionine | This study       |
| pBAD-AB_R-Ub <sub>3,13</sub> -C | Identical to pBAD-AB_R-Ub-C apart from ubiquitin Ile to Gly mutations at amino acid positions 3 and 13                                                                                                                                                                                                                      | This study       |
| pBAD-AB_R-mGFP-C                | Identical to pBAD-AB_R-Ub-C but containing mGFP instead of ubiquitin                                                                                                                                                                                                                                                        | This study       |
| pBAD-ABC-Ub-H                   | pBAD/MCS vector containing the genes <i>trwA</i> , <i>trwB</i> , and modified <i>trwC</i> ; TrwC contains (Gly) <sup>3</sup> Ser(Gly) <sup>3</sup> Ub-(Gly) <sup>3</sup> SerGly followed by a duplicated helicase domain (H; aa 313-966) and a hexahistidine tag at its C-terminus                                          | This study       |
| pBAD-ABC-Ub <sub>3,13</sub> -H  | Identical to pBAD-ABC-Ub-H apart from ubiquitin Ile to Gly mutations at amino acid positions 3 and 13                                                                                                                                                                                                                       | This study       |
| pBAD-ABC-mGFP-H                 | Identical to pBAD-ABC-Ub-H but containing mGFP instead of ubiquitin                                                                                                                                                                                                                                                         | This study       |
| pEL04                           | Vector containing the <i>cm-sacB</i> cassette to be used for positive/negative selection in recombineering. Positive selection using chloramphenicol, and negative selection against the <i>sacB</i> gene using sucrose.                                                                                                    | NCI at Frederick |
| R388_R-Ub-TrwC                  | R388 plasmid encoding modified TrwC; TrwC contains a duplicated relaxase domain (R; aa 1-305) followed by (Gly) <sup>3</sup> -His6-GlySer(Gly) <sup>3</sup> Ub-(Gly) <sup>3</sup> SerGly at its N-terminus and the second relaxase domain lacks the first methionine                                                        | This study       |
| R388_R-Ub <sub>3,13</sub> -TrwC | Identical to R388_R-Ub-TrwC apart from ubiquitin Ile to Gly mutations at amino acid positions 3 and 13                                                                                                                                                                                                                      | This study       |
| R388_R-mGFP-TrwC                | Identical to R388_R-Ub-TrwC but containing mGFP instead of ubiquitin                                                                                                                                                                                                                                                        | This study       |
| R388_TrwC-Ub-H                  | R388 plasmid encoding modified TrwC; TrwC contains (Gly) <sup>3</sup> Ser(Gly) <sup>3</sup> Ub-(Gly) <sup>3</sup> SerGly followed by a duplicated helicase domain (H; aa 313-966) and a hexahistidine tag at its C-terminus                                                                                                 | This study       |
| R388_TrwC-Ub <sub>3,13</sub> -H | Identical to R388_TrwC-Ub-H apart from ubiquitin Ile to Gly mutations at amino acid positions 3 and 13                                                                                                                                                                                                                      | This study       |

|                              |                                                                                                                                                                                                                 |            |
|------------------------------|-----------------------------------------------------------------------------------------------------------------------------------------------------------------------------------------------------------------|------------|
| R388_TrwC-mGFP-H             | Identical to R388_TrwC-Ub-H but containing mGFP instead of ubiquitin                                                                                                                                            | This study |
| R388_R-Ub-H                  | R388 plasmid encoding modified TrwC; TrwC contains (Gly) <sup>3</sup> Ser(Gly) <sup>3</sup> -Ub-(Gly) <sup>3</sup> SerGly inserted between the TrwC relaxase (R; aa 1-312) and helixase (H; aa 313-966) domains | This study |
| R388_R-Ub <sup>3,13</sup> -H | Identical to R388_R-Ub-H apart from ubiquitin Ile to Gly mutations at amino acid positions 3 and 13                                                                                                             | This study |
| R388_R-mGFP-H                | R388 plasmid encoding modified TrwC; TrwC contains mGFP inserted between the TrwC relaxase (R; aa 1-312) and helixase (H; aa 1-313) domains with (Gly) <sup>3</sup> SerGly linkers at both sides                | This study |



|                                |                                                                                                             |                            |                                                                                                            |
|--------------------------------|-------------------------------------------------------------------------------------------------------------|----------------------------|------------------------------------------------------------------------------------------------------------|
| mGFP-H fwd<br>mGFP-R rev       | GGAGGTGGCAGCGGCATGCCTTC<br>CGACGAGG<br>ACCGCTCCCACCGCCGAATGAATG<br>GGCCTGTTTTTCTG                           | pBAD-<br>AB_R-<br>mGFP-H   | primers used to linearize pBAD-ABCHis plasmid                                                              |
| N-mGFP fwd<br>N-mGFP rev       | GACTATCTAATGGTGAGCAAGGGC<br>GAGGAGC<br>CATACCGCCGCTACCGCCTCCCTT<br>GTACAGCTC                                | pBAD-<br>AB_mGFP-<br>C     | primers used to amplify <i>mGFP</i> from pBAD-ABC-mGFP plasmid                                             |
| mGFP-TrwC fwd<br>mGFP-TrwB rev | GGTAGCGGCGGTATGCTCAGTCA<br>CATGGTATTGACC<br>CACCATTAGATAGTCCCCTCAACA<br>AAGG                                | pBAD-<br>AB_mGFP-<br>C     | primers used to linearize pBAD-ABCHis plasmid                                                              |
| Ub I3G<br>Ub I13G              | CAGGGTCTTCACGAAG <u>CC</u> CTGCAT<br>ATGTATATCTCC<br>CTCCACTTCGAGAGT <u>G</u> <u>CC</u> GGTCTT<br>ACCAGTCAG | pET17-<br>Ubl3G,I13<br>G   | primers for multi site-directed mutagenesis that incorporate ubiquitin I3G and I13G mutations (underlined) |
| Ub int fwd<br>Ub int rev       | GGCGGTGGGAGCGGTGGGGGCAT<br>GCAGATCTTCGTGAAGACCCTGAC<br>GCCGCTGCCACCTCCCCACCTCT<br>GAGACGGAGG                | pBAD-<br>AB_R-Ub-<br>H     | primers used to amplify Ub sequence from pET17-Ub plasmid                                                  |
| Ub-H fwd<br>Ub-R rev           | GGAGGTGGCAGCGGCATGCCTTC<br>CGACGAGG<br>ACCGCTCCCACCGCCGAATGAATG<br>GGCCTGTTTTTCTG                           | pBAD-<br>AB_R-Ub-<br>H     | primers used to linearize pBAD-ABCHis plasmid                                                              |
| Ub3,13 int fwd<br>Ub int rev   | GGCGGTGGGAGCGGTGGGGGCAT<br>GCAGGGCTTCGTGAAGACCCTGA<br>C<br>GCCGCTGCCACCTCCCCACCTCT<br>GAGACGGAGG            | pBAD-<br>AB_R-<br>Ub3,13-H | primers used to amplify Ubl3G,I13G sequence from pET17-Ubl3G,I13G plasmid                                  |
| Ub-H fwd<br>Ub-R rev           | GGAGGTGGCAGCGGCATGCCTTC<br>CGACGAGG<br>ACCGCTCCCACCGCCGAATGAATG<br>GGCCTGTTTTTCTG                           | pBAD-<br>AB_R-<br>Ub3,13-H | primers used to linearize pBAD-ABCHis plasmid                                                              |
| N-Ub fwd<br>N-Ub rev           | ATCTAATGCAGATCTTCGTGAAGA<br>CCCTGAC<br>GCCGCTACCGCCTCCCCACCTCT<br>GAGACGGAGG                                | pBAD-<br>AB_Ub-C           | primers used to amplify Ub sequence from pET17-Ub plasmid                                                  |
| Ub-TrwC fwd<br>Ub-TrwB rev     | GGAGGCGGTAGCGGCGGTATGCT<br>CAGTCACATGGTATTGACC<br>AGATCTGCATTAGATAGTCCCCTC<br>AACAAAGG                      | pBAD-<br>AB_Ub-C           | primers used to linearize pBAD-ABCHis plasmid                                                              |
| N-Ub3,13 fwd<br>N-Ub rev       | ATCTAATGCAGGGCTTCGTGAAGA<br>CC<br>GCCGCTACCGCCTCCCCACCTCT<br>GAGACGGAGG                                     | pBAD-<br>AB_Ub3,13<br>-C   | primers used to amplify Ubl3G,I13G sequence from pET17-Ubl3G,I13G plasmid                                  |
| Ub-TrwC fwd<br>Ub3,13-TrwB rev | GGAGGCGGTAGCGGCGGTATGCT<br>CAGTCACATGGTATTGACC<br>AGCCCTGCATTAGATAGTCCCCTC<br>AACAAAGG                      | pBAD-<br>AB_Ub3,13<br>-C   | primers used to linearize pBAD-ABCHis plasmid                                                              |
| C-Cre fwd<br>NC-Cre rev        | GGTTCCAATTTACTGACCGTACAC<br>C                                                                               | pBAD-<br>ABC-Cre           | primers used to amplify Cre sequence                                                                       |

|                                                    |                                                                                            |                              |                                                                                        |
|----------------------------------------------------|--------------------------------------------------------------------------------------------|------------------------------|----------------------------------------------------------------------------------------|
|                                                    | CGCCTCCATCGCCATCTTCCAGCA<br>G                                                              |                              | from pBABE-Cre-ER-ERT2 plasmid                                                         |
| Cre-His<br>fwd<br>Cre-TrwC<br>rev                  | ATGGCGATGGAGGCGGGCATCAT<br>CATC<br>CAGTAAATTGGAACCGCCACCCCT<br>TCCG                        | pBAD-<br>ABC-Cre             | primers used to amplify the portion of the pBAD-ABC-mGFP plasmid lacking mGFP          |
| Cre int<br>fwd<br>Cre int<br>rev                   | GGTTCCAATTTACTGACCGTACAC<br>C<br>GCCACCTCCATCGCCATCTTCCAG<br>CAG                           | pBAD-<br>AB_R-Cre-<br>H      | primers used to amplify Cre sequence from pBABE-Cre-ER-ERT2 plasmid                    |
| Cre-H fwd<br>Cre-R rev                             | GGCGATGGAGGTGGCAGCGGCAT<br>G<br>CAGTAAATTGGAACCGCTCCCACC<br>GCCGAATG                       | pBAD-<br>AB_R-Cre-<br>H      | primers used to amplify the portion of the pBAD-AB_R-mGFP-H plasmid lacking mGFP       |
| N-Cre fwd<br>NC-Cre<br>rev                         | CTAATGTCCAATTTACTGACCGTAC<br>ACC<br>CGCCTCCATCGCCATCTTCCAGCA<br>G                          | pBAD-<br>AB_Cre-C            | primers used to amplify Cre sequence from pBABE-Cre-ER-ERT2 plasmid                    |
| Cre-TrwC<br>fwd<br>Cre-TrwB<br>rev                 | ATGGCGATGGAGGCGGTAGCGGC<br>GGTATG<br>TAAATTGGACATTAGATAGTCCCCT<br>CAACAAAGG                | pBAD-<br>AB_Cre-C            | primers used to amplify the portion of the pBAD-AB_mGFP-C plasmid lacking mGFP         |
| Cre<br>Y324F<br>sense<br>Cre<br>Y324F<br>antisense | CCAATGTAAATATTGTCATGAACTT<br>TATCCGTAACCTGG<br>CCAGGTTACGGATAAAGTTCATGA<br>CAATATTTACATTGG | pBAD-<br>AB_Cre(Y3<br>24F)-C | primers for site-directed mutagenesis that incorporate Cre Y324F mutation (underlined) |
| TrwC fwd<br>TrwC rev                               | CATGCTCAGTCACATGGTATTGAC<br>C<br>ATCTCATTACCTTCCGGCCTCCAT<br>GC                            | pETZt-<br>TrwC               | primers used to amplify <i>trwC</i> from pBAD-ABCHis plasmid                           |
| pETZt fwd<br>TrwC-<br>pETZt rev                    | GGAAGGTAATGAGATCCGGCTGCT<br>AACAAAGC<br>ATGTGACTGAGCATGGCGCCCTGA<br>AAATAAAGATTC           | pETZt-<br>TrwC               | primers used to linearize pETZt vector                                                 |
| mGFP<br>fwd<br>TrwC rev                            | GCCATGGTGAGCAAGGGCGAG<br>ATCTCATTACCTTCCGGCCTCCAT<br>GC                                    | pETZt-<br>mGFP-<br>TrwC      | primers used to amplify <i>mGFP-trwC</i> from pBAD-AB_mGFP-C plasmid                   |
| pETZt fwd<br>mGFP-<br>pETZt rev                    | GGAAGGTAATGAGATCCGGCTGCT<br>AACAAAGC<br>CTTGCTCACCATGGCGCCCTGAAA<br>ATAAAGATTC             | pETZt-<br>mGFP-<br>TrwC      | primers used to linearize pETZt vector                                                 |
| Cre-Ub<br>fwd<br>TrwC int<br>rev                   | GGGAGCGGTGGGGGCATGCAGAT<br>CTTCGTGAAGACCCTG<br>GCATAGGCATGATCGACGTGC                       | pBAD-<br>AB_Cre-<br>Ub-C     | primers used to amplify Ub-TrwC sequence from pBAD-AB_Ub-C plasmid                     |



|                                          |                                                                                      |                                                                                                                                 |                                                                                                                |
|------------------------------------------|--------------------------------------------------------------------------------------|---------------------------------------------------------------------------------------------------------------------------------|----------------------------------------------------------------------------------------------------------------|
| TrwC int<br>fwd<br>linker-Cre<br>rev     | CGATCATGCCTATGCGACGAC<br>GCCCCACCGCTCCCACCATCGC<br>CATCTTCCAGCAG                     | pBAD-<br>AB_Cre-<br>Ub-C<br>pBAD-<br>AB_Cre-<br>Ub3,13-C<br>pBAD-<br>AB_Cre-<br>mGFP-C<br>pBAD-<br>AB_Cre-<br>Cre(Y324F)-<br>-C | primers used to<br>linearize pBAD-<br>AB_Cre-C plasmid                                                         |
| Cre-<br>Ub3,13<br>fwd<br>TrwC int<br>rev | GGGAGCGGTGGGGGCATGCAGG<br>GCTTCGTGAAGACC<br>GCATAGGCATGATCGACGTGC                    | pBAD-<br>AB_Cre-<br>Ub3,13-C                                                                                                    | primers used to<br>amplify Ub3,13-TrwC<br>sequence from pBAD-<br>AB_Ub3,13-C plasmid                           |
| Cre-<br>mGFP<br>fwd<br>TrwC int<br>rev   | GGGAGCGGTGGGGGCGTGAGCAA<br>GGGCGAGGAGC<br>GCATAGGCATGATCGACGTGC                      | pBAD-<br>AB_Cre-<br>mGFP-C                                                                                                      | primers used to<br>amplify mGFP-TrwC<br>sequence from pBAD-<br>AB_mGFP-C plasmid                               |
| Cre-Cre<br>fwd<br>TrwC int               | GGGAGCGGTGGGGGCTCCAATTT<br>ACTGACCGTACACCAAATTTGC<br>GCATAGGCATGATCGACGTGC           | pBAD-<br>AB_Cre-<br>Cre(Y324F)-<br>-C                                                                                           | primers used to<br>amplify Cre(Y324F)-<br>TrwCsequence from<br>pBAD-<br>AB_Cre(Y324F)-C<br>plasmid             |
| pBAD fwd<br>His-R rev                    | CGGAAGGTAATGAGCTCCGTCGAC<br>AAGCTTG<br>GTGATGATGGTATGACCGCCACC<br>TGAACCGCCCTTCTCCC  | pBAD-<br>AB_R-Ub-<br>C<br>pBAD-<br>AB_R-<br>Ub3,13-C                                                                            | primers used to<br>linearize pBAD-<br>ABHis plasmid<br>lacking helicase<br>domain and the<br>hexahistidine tag |
| His-Ub<br>fwd<br>linker-Ub<br>rev        | CATCACCATCATCACCATGGGAGC<br>GGTGGGGGCATG<br>GCCGCTGCCACCTCCCCACCTCT<br>GAGACGGAGGACC | pBAD-<br>AB_R-Ub-<br>C<br>pBAD-<br>AB_R-<br>Ub3,13-C                                                                            | primers used to<br>amplify Ub/Ub3,13<br>sequence from pBAD-<br>AB_R-Ub-H plasmid                               |
| linker-<br>TrwC fwd<br>TrwC rev<br>2     | GGAGGTGGCAGCGGCCTCAGTCA<br>CATGGTATTGACCCGACAG<br>GCTCATTACCTTCCGGCCTCCATG<br>CC     | pBAD-<br>AB_R-Ub-<br>C<br>pBAD-<br>AB_R-<br>Ub3,13-C                                                                            | primers used to<br>amplify <i>trwC</i> from<br>pBAD-ABHis<br>plasmid                                           |
| linker-<br>TrwC 2<br>mGFP-<br>His rev    | GGAGGTGGCAGCGGCCTCAGTCA<br>CATGGTATTGACC<br>CTCGCCCTTGCTCACGCCCCACC<br>GCTCCCATG     | pBAD-<br>AB_R-<br>mGFP-C                                                                                                        | primers used to<br>linearize pBAD-AB_R-<br>Ub-C plasmid lacking<br>ubiquitin sequence                          |
| mGFP<br>fwd 2                            | GTGAGCAAGGGCGAGGAGC<br>GCCGCTGCCACCTCCCTTG                                           | pBAD-<br>AB_R-<br>mGFP-C                                                                                                        | primers used to<br>amplify mGFP<br>sequence from pBAD-                                                         |

|                                 |                                                                |                                                |                                                                                                      |
|---------------------------------|----------------------------------------------------------------|------------------------------------------------|------------------------------------------------------------------------------------------------------|
| mGFP rev<br>2                   |                                                                |                                                | AB_R-mGFP-H<br>plasmid                                                                               |
| TrwC-<br>linker fwd<br>TrwB rev | CGGAAGGGGCGGTGGGAGCGGT<br>GG<br>CCTCAACAAAGGCCGGTTGC           | pBAD-<br>ABC-Ub-H<br>pBAD-<br>ABC-<br>Ub3,13-H | primers used to<br>amplify Ub/Ub3,13-H-<br>pBAD-AB from pBAD-<br>AB_R-Ub/Ub3,13-H<br>plasmid         |
| TrwB fwd<br>TrwC rev<br>3       | CGGCCTTTGTTGAGGGGACTATC<br>CCACCGCCCCTTCGGCCTCCATG             | pBAD-<br>ABC-Ub-H<br>pBAD-<br>ABC-<br>Ub3,13-H | primers used to<br>amplify <i>trwC</i> from<br>pBAD-ABCHis<br>plasmid                                |
| mGFP<br>fwd 2<br>TrwB rev       | GTGAGCAAGGGCGAGGAGC<br>CCTCAACAAAGGCCGGTTGC                    | pBAD-<br>ABC-<br>mGFP-H                        | primers used to<br>linearize pBAD-AB_R-<br>mGFP-H plasmid<br>lacking the relaxase<br>domain sequence |
| TrwB fwd<br>mGFP-<br>linker rev | CGGCCTTTGTTGAGGGGACTATC<br>CTCGCCCTTGCTCACGCCCCACC<br>GCTCCCAC | pBAD-<br>ABC-<br>mGFP-H                        | primers used to<br>amplify <i>trwC</i> from<br>pBAD-ABC-Ub-H<br>plasmid                              |

## Supplemental References

- 1- Low, H. H., Gubellini, F., Rivera-Calzada, A., Braun, N., Connery, S., Dujeancourt, A., Lu, F., Redzej, A., Fronzes, R., Orlova, E. V., and Waksman, G. (2014) Structure of a type IV secretion system. *Nature* **508**, 550-553
- 2- Redzej, A., Ukleja, M., Connery, S., Trokter, M., Felisberto-Rodrigues, C., Cryar, A., Thalassinou, K., Hayward, R. D., Orlova, E. V., and Waksman, G. (2017) Structure of a VirD4 coupling protein bound to a VirB type IV
- 3- Lang, S., Gruber, K., Mihajlovic, S., Arnold, R., Gruber, C. J., Steinlechner, S., Jehl, M. A., Rattei, T., Frohlich, K. U., and Zechner, E. L. (2010) Molecular recognition determinants for type IV secretion of diverse families of conjugative relaxases. *Molecular microbiology* **78**, 1539-1555
- 4- Trokter, M., Mücke, N., Surrey, T. (2012) Reconstitution of the human cytoplasmic dynein complex. *Proc. Natl. Acad. Sci.* **109**, 20895-900
- 5- Hospenthal, M. K., Freund, S. M., Komander, D. (2013) Assembly, analysis and architecture of atypical ubiquitin chains. *Nat. Struct. Mol. Biol.* **20**, 555-65
